# Supplementary material for: In Situ Hybridization (RNAscope) Detection of Bluetongue Virus Serotypes 10 and 17 in Experimentally Co-Infected Culicoides sonorensis
Source: MDPI journal article supplement (doi:10.3390/pathogens12101207), 2023-09-30
Supplement: s1 [file s1]

**Table S1.** BTV TCID<sub>50</sub>/mL in blood meal for infection groups.

| <b>Treatment Group</b>                | <b>BTV-10<br/>TCID<sub>50</sub>/mL</b> | <b>BTV-17<br/>TCID<sub>50</sub>/mL</b> | <b>Total<br/>TCID<sub>50</sub>/mL</b> |
|---------------------------------------|----------------------------------------|----------------------------------------|---------------------------------------|
| <b>Negative control blood meal</b>    | N/A                                    | N/A                                    | N/A                                   |
| <b>BTV-10 blood meal</b>              | 1 x 10 <sup>5</sup>                    | N/A                                    | 1 x 10 <sup>5</sup>                   |
| <b>BTV-17 blood meal</b>              | N/A                                    | 1 x 10 <sup>5</sup>                    | 1 x 10 <sup>5</sup>                   |
| <b>BTV-10 &amp; BTV-17 blood meal</b> | 5 x 10 <sup>4</sup>                    | 5 x 10 <sup>4</sup>                    | 1 x 10 <sup>5</sup>                   |

**Table S2.** GenBank accession # for BTV-17 & BTV-10 segments.

| <b>Nucleic Acid Segment</b> | <b>BTV-17<br/>CO 2018</b> | <b>BTV-10 ATCC<br/>CA 1952</b> |
|-----------------------------|---------------------------|--------------------------------|
| 1                           | OQ798198                  | MW456747                       |
| 2                           | OQ798199                  | MW456748                       |
| 3                           | OQ798200                  | MW456749                       |
| 4                           | OQ798201                  | MW456750                       |
| 5                           | OQ798202                  | MW456751                       |
| 6                           | OQ798203                  | MW456752                       |
| 7                           | OQ798204                  | MW456753                       |
| 8                           | OQ798205                  | MW456754                       |
| 9                           | OQ798206                  | MW456755                       |
| 10                          | OQ798207                  | MW456756                       |

**Table S3.** Probe targets.

| <b>Probe</b>               | <b>Probe Description</b> | <b>NCBI sequence</b>     | <b>Nucleotide position</b> |
|----------------------------|--------------------------|--------------------------|----------------------------|
| <b>Negative</b>            | DapB                     | ACD provided             | ACD provided               |
| <b>Positive Control C1</b> | Cso-TSA-m41748           | GAWM01010754             | 2-954                      |
| <b>Positive Control C2</b> | Cso-V-ATPase16           | AY752855                 | 2-668                      |
| <b>C1</b>                  | V-BTV17-segment2-VP2-C1  | OQ798199                 | 1801-2839                  |
| <b>C2</b>                  | V-BTV10-segment2-VP2-C2  | JQ740772 and<br>MW456748 | 184 – 1168                 |

**Table S4.** Hybridization and signal detection steps

| <b>Hybridization reagent</b>       | <b>Incubation Temp</b> | <b>Incubation Time</b> |
|------------------------------------|------------------------|------------------------|
| AMP1                               | 40° C                  | 30min                  |
| AMP2                               | 40° C                  | 15min                  |
| AMP3                               | 40° C                  | 30min                  |
| AMP4                               | 40° C                  | 15min                  |
| AMP5                               | Room Temp              | 30min                  |
| AMP6                               | Room Temp              | 15min                  |
| <b>C2 (red) Signal detection</b>   | Room Temp              | 10min                  |
| AMP7                               | 40° C                  | 15min                  |
| AMP8                               | 40° C                  | 30min                  |
| AMP9                               | Room Temp              | 30min                  |
| AMP10                              | Room Temp              | 15min                  |
| <b>C1 (green) Signal detection</b> | Room Temp              | 10min                  |
